# Supplementary material
Source: Springer Nature journal article supplement (https://www.springermedizin.de/resource/supplementary/12889_2008_1193_MOESM2_ESM.pdf/9502658)
Supplement: MOESM2 [file 9502658]

|                                                                                                    | Input                                                                                                                                                                                                                                                                               | Activities                                                                                                                                                                                                                                                                                  | Outputs                                                                                                                                                                                                                                                                                 | Immediate Change                                                                                                                                                                                                                                              | Intermediate Change                                                                                                                                                                                                               | Long-term Changes                                                                                                                                                                                                                                                            | Community/School/Family Impact                                                                                                                                                                                                                                            |
|----------------------------------------------------------------------------------------------------|-------------------------------------------------------------------------------------------------------------------------------------------------------------------------------------------------------------------------------------------------------------------------------------|---------------------------------------------------------------------------------------------------------------------------------------------------------------------------------------------------------------------------------------------------------------------------------------------|-----------------------------------------------------------------------------------------------------------------------------------------------------------------------------------------------------------------------------------------------------------------------------------------|---------------------------------------------------------------------------------------------------------------------------------------------------------------------------------------------------------------------------------------------------------------|-----------------------------------------------------------------------------------------------------------------------------------------------------------------------------------------------------------------------------------|------------------------------------------------------------------------------------------------------------------------------------------------------------------------------------------------------------------------------------------------------------------------------|---------------------------------------------------------------------------------------------------------------------------------------------------------------------------------------------------------------------------------------------------------------------------|
| 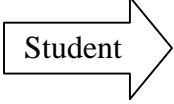 <p>Student</p>    | <ul style="list-style-type: none"> <li>◆ Switch's materials motivate, build awareness, set baseline and goals, and measure progress.</li> <li>● Reinforcements for maintenance and alternative activities.</li> <li>● On-going support from NIMF.</li> </ul>                        | <ul style="list-style-type: none"> <li>◆ Kick-off event builds awareness</li> <li>◆ Log and calendar set goals and track progress.</li> <li>◆ Pedometer measure activity.</li> <li>◆ Trading cards, recipes, and activities build prize points.</li> <li>◆ Support over 8 months</li> </ul> | <ul style="list-style-type: none"> <li>◆ Develops individual baseline and goals for increasing activity and intake of fruits &amp; vegetables.</li> <li>◆ Tracks progress over 4 phases in 8 months.</li> <li>◆ Builds reinforcements.</li> </ul>                                       | <ul style="list-style-type: none"> <li>◆ Influences family's healthier food buying.</li> <li>◆ Increases activity level.</li> <li>◆ Makes more conscious choice of media.</li> <li>◆ Increased awareness of connection between choices and health.</li> </ul> | <ul style="list-style-type: none"> <li>◆ Increase intake of fruits/vegetables up to 5/day.</li> <li>◆ Increase physical activity up to 1 hour/day.</li> <li>◆ Decrease screen time towards 2 hours/day.</li> </ul>                | <ul style="list-style-type: none"> <li>◆ Healthier food choices.</li> <li>◆ Physical activity part of every day.</li> <li>◆ Screen time at recommended level.</li> <li>◆ Physical weight within healthy guidelines.</li> <li>◆ Increase involvement in community.</li> </ul> | <ul style="list-style-type: none"> <li>◆ Decreased health care costs.</li> <li>◆ Increased civility in community, school, family.</li> <li>◆ Greater student achievement.</li> <li>◆ Schools and neighborhoods are safer and more connected.</li> </ul>                   |
|  <p>Family</p>     | <ul style="list-style-type: none"> <li>◆ Switch's materials motivate, build awareness, set baseline and goals, measure and reinforce progress.</li> <li>● Support tools.</li> <li>● On-going support from NIMF.</li> </ul>                                                          | <ul style="list-style-type: none"> <li>◆ Parent information strategies build awareness.</li> <li>◆ Provide materials to set and track individual family goals and progress.</li> <li>◆ Provide support over 8 months.</li> </ul>                                                            | <ul style="list-style-type: none"> <li>◆ Develops family support goal for increasing activity and intake of fruit &amp; vegetables.</li> <li>◆ Limits screen time.</li> <li>◆ Tracks progress.</li> <li>◆ Builds reinforcements.</li> </ul>                                             | <ul style="list-style-type: none"> <li>◆ Increased awareness of connection between choices and health.</li> <li>◆ Awareness of family's food consumption, media habits, and activity level.</li> </ul>                                                        | <ul style="list-style-type: none"> <li>◆ Food buying, meals, and snacks include more fruits and vegetables.</li> <li>◆ Increased control over media use.</li> <li>◆ Building in more physical activity to family time.</li> </ul> | <ul style="list-style-type: none"> <li>◆ Healthier food choices.</li> <li>◆ Physical activity part of every day.</li> <li>◆ Screen time at recommended level.</li> <li>◆ Healthy weight.</li> <li>◆ Increase community involvement.</li> </ul>                               | <ul style="list-style-type: none"> <li>◆ Decreased health care costs.</li> <li>◆ Healthier families.</li> <li>◆ Increase in community involvement.</li> <li>◆ Increased civility at home, school, community.</li> </ul>                                                   |
|  <p>Community</p> | <ul style="list-style-type: none"> <li>◆ Public Service Announcements.</li> <li>◆ Switch's news columns.</li> <li>◆ School materials</li> <li>◆ Posters &amp; brochures distributed community-wide.</li> <li>◆ Media interviews.</li> <li>◆ Public Information sessions.</li> </ul> | <ul style="list-style-type: none"> <li>◆ Community-wide kick-off event builds awareness.</li> <li>◆ Presentations to schools, community &amp; business groups.</li> <li>◆ Grand-round presentations for health care providers.</li> </ul>                                                   | <ul style="list-style-type: none"> <li>◆ Community supports and promotes campaign.</li> <li>◆ School acts as supportive nexus</li> <li>◆ Provides incentives for families.</li> <li>◆ Provides in-kind donations.</li> <li>◆ Provides channels for information distribution.</li> </ul> | <ul style="list-style-type: none"> <li>◆ Awareness of issue builds.</li> <li>◆ Support for campaign builds.</li> <li>◆ Classroom support builds.</li> <li>◆ Communication , support, and networking channels open.</li> </ul>                                 | <ul style="list-style-type: none"> <li>◆ Health and fitness goals widely supported.</li> <li>◆ Strategic health and fitness partners more connected.</li> </ul>                                                                   | <ul style="list-style-type: none"> <li>◆ Health and fitness activities widely promoted and available to families.</li> <li>◆ Strategic health and fitness partners actively supporting.</li> </ul>                                                                           | <ul style="list-style-type: none"> <li>◆ Decreased health care costs.</li> <li>◆ Healthier families.</li> <li>◆ Less absenteeism</li> <li>◆ Involved &amp; aware school and community</li> <li>◆ Increased civility in schools, neighborhoods , and community.</li> </ul> |
